# Supplementary material for: Elevated UTI Biomarkers in Symptomatic Patients with Urine Microbial Densities of 10,000 CFU/mL Indicate a Lower Threshold for Diagnosing UTIs
Source: MDPI journal article supplement (doi:10.3390/diagnostics13162688), 2023-08-16
Supplement: s1 [file s1]

**Supplementary Table S1.** Inclusion and Exclusion Criteria.

| Inclusion                                                                                          | Exclusion                              |
|----------------------------------------------------------------------------------------------------|----------------------------------------|
| At least 60 years of age                                                                           |                                        |
| Male or Female sex                                                                                 |                                        |
| (no predetermined quotas or ratios for participation)                                              |                                        |
| Presenting to a urologist or urogynecologist in an outpatient setting                              |                                        |
| Requires microbial testing according to clinician judgment                                         | Failure to meet all inclusion criteria |
| Sample ordered with an ICD-10-CM code associated with UTI                                          |                                        |
| Sample contained enough urine to conduct M-PCR/P-AST, SUC, and biomarker assays on the same sample |                                        |

**Supplementary Table S2.** Bacterial Identification and Frequency by M-PCR and SUC in UTI symptomatic patients.

| Organism              | Method | Cases                                                                               | %       | Organism               | Method | Cases                                                                                 | %       |
|-----------------------|--------|-------------------------------------------------------------------------------------|---------|------------------------|--------|---------------------------------------------------------------------------------------|---------|
| <i>E. coli</i>        | SUC    |    | 160 27% | <i>E. faecalis</i>     | SUC    |    | 150 26% |
|                       | M-PCR  |    | 188 32% |                        | M-PCR  |    | 94 16%  |
| <i>K. pneumoniae</i>  | SUC    |    | 59 10%  | VGS                    | SUC    |    | 2 <1%   |
|                       | M-PCR  |    | 63 11%  |                        | M-PCR  |    | 84 14%  |
| <i>P. mirabilis</i>   | SUC    |    | 29 5%   | CoNS                   | SUC    |    | 32 5%   |
|                       | M-PCR  |  | 24 4%   |                        | M-PCR  |  | 25 4%   |
| <i>P. aeruginosa</i>  | SUC    |  | 14 2%   | <i>S. agalactiae</i>   | SUC    |  | 9 2%    |
|                       | M-PCR  |  | 22 4%   |                        | M-PCR  |  | 12 2%   |
| Enterobacter Group    | SUC    |  | 8 1%    | <i>E. faecium</i>      | SUC    |  | 7 1%    |
|                       | M-PCR  |  | 13 2%   |                        | M-PCR  |  | 10 2%   |
| <i>M. morganii</i>    | SUC    |  | 4 1%    | <i>S. aureus</i>       | SUC    |  | 3 1%    |
|                       | M-PCR  |  | 9 2%    |                        | M-PCR  |  | 5 1%    |
| <i>C. freundii</i>    | SUC    |  | 5 1%    | <i>A. urinae</i>       | SUC    |  | 4 1%    |
|                       | M-PCR  |  | 6 1%    |                        | M-PCR  |  | 118 20% |
| <i>K. oxytoca</i>     | SUC    |  | 2 <1%   | <i>A. schalii</i>      | SUC    |  | 0 0%    |
|                       | M-PCR  |  | 4 1%    |                        | M-PCR  |  | 116 20% |
| <i>C. koseri</i>      | SUC    |  | 4 1%    | <i>G. vaginalis</i>    | SUC    |  | 0 0%    |
|                       | M-PCR  |  | 2 <1%   |                        | M-PCR  |  | 35 6%   |
| <i>S. marcescens</i>  | SUC    |  | 1 <1%   | <i>A. omnicolens</i>   | SUC    |  | 0 0%    |
|                       | M-PCR  |  | 2 <1%   |                        | M-PCR  |  | 17 3%   |
| <i>P. stuartii</i>    | SUC    |  | 0 0%    | <i>U. urealyticum</i>  | SUC    |  | 0 0%    |
|                       | M-PCR  |  | 1 <1%   |                        | M-PCR  |  | 5 1%    |
| <i>A. baumannii</i>   | SUC    |  | 0 0%    | <i>C. riegelii</i>     | SUC    |  | 0 0%    |
|                       | M-PCR  |  | 0 0%    |                        | M-PCR  |  | 5 1%    |
| <i>P. agglomerans</i> | SUC    |  | 1 <1%   | <i>M. hominis</i>      | SUC    |  | 0 0%    |
|                       | M-PCR  |  | 0 0%    |                        | M-PCR  |  | 3 1%    |
| <b>Gram-negative</b>  |        |                                                                                     |         | <b>Gram-positive</b>   |        |                                                                                       |         |
| <i>C. glabrata</i>    | SUC    |  | 1 <1%   | <i>C. parapsilosis</i> | SUC    |  | 0 0%    |
|                       | M-PCR  |  | 16 3%   |                        | M-PCR  |  | 1 <1%   |
| <i>C. albicans</i>    | SUC    |  | 1 <1%   | <i>C. auris</i>        | SUC    |  | 0 0%    |
|                       | M-PCR  |  | 3 1%    |                        | M-PCR  |  | 0 0%    |
| <b>Yeast</b>          |        |                                                                                     |         | <b>Fastidious</b>      |        |                                                                                       |         |
